# Supplementary material
Source: ML conference proceedings conference paper supplement (https://openreview.net/forum?id=MU0yqXIoleL)
Supplement: supplementary_material [file attachment]

# CONVOLUTIONAL COMPLEX KNOWLEDGE GRAPH EMBEDDINGS

## SUPPLEMENTAL MATERIAL.

**Anonymous authors**

Paper under double-blind review

### 1 EVALUATION SETTING

Following Bordes et al. (2013), we applied filtered Mean Reciprocal Rank (MRR) as our main evaluation metric for link prediction. During testing, we generated a set of candidate triples  $\mathcal{C}_i$  for each  $(s, p, o)_i \in \mathcal{G}^{\text{Test}}$ :  $\mathcal{C}_i = \{x | x \in \mathcal{E} \wedge (s, p, x)\}$ . As  $\mathcal{C}_i$  can contain several true triples, we removed all known triples from  $\mathcal{C}_i$ . Finally, we rank each triple in  $\mathcal{C}_i$  in descending order of scores. The rank of a missing entity in  $i$ -th test triple is then calculated as

$$\text{Rank}_i = 1 + \sum_{x \in \mathcal{C}_i \setminus \mathcal{G}} I[\phi((s, p, o)_i) < \phi((s, p, x))], \quad (1)$$

where  $I[P] = 1$  iff the  $P$  is true and 0 otherwise. Following the definition of the rank of a triple, the MRR and H@N are defined in Equation (2) and Equation (3):

$$\text{MRR} = \frac{1}{|\mathcal{G}^{\text{Test}}|} \sum_i \frac{1}{\text{Rank}_i}, \quad (2)$$

$$\text{H@N} = \frac{1}{|\mathcal{G}^{\text{Test}}|} \sum_i I[\text{Rank}_i < N]. \quad (3)$$

### 2 LINK PREDICTION RESULTS PER RELATIONS

Table 1: Link prediction results of the most frequent 10 relations in the test data for CONEX tested on UMLS. # denotes the number of occurrences of a relation.

| Relations      | #Train | #Test | MRR  | H@10 | H@3  | H@1  |
|----------------|--------|-------|------|------|------|------|
| affects        | 803    | 110   | .987 | 1.00 | .999 | .981 |
| result_of      | 455    | 71    | .992 | 1.00 | 1.0  | .985 |
| interacts_with | 363    | 49    | .920 | 1.00 | .979 | .857 |
| isa            | 399    | 47    | .820 | .957 | .829 | .765 |
| causes         | 283    | 37    | 1.00 | 1.00 | 1.00 | 1.00 |
| location_of    | 244    | 36    | 1.00 | .944 | 1.00 | .972 |
| produces       | 221    | 28    | 1.00 | 1.00 | 1.00 | 1.00 |
| process_of     | 369    | 27    | .925 | 1.00 | .962 | .888 |
| complicates    | 219    | 26    | .980 | 1.00 | 1.00 | .961 |
| issue_in       | 223    | 24    | 1.00 | 1.00 | 1.00 | 1.00 |

### 3 HYPER-PARAMETERS

Throughout experiments, we set learning rate to 0.0005 and decay rate 1.0 and omit them from grid-search. ls, dout, c and r denote, label smoothing, dropout rate, the number of output channels

Table 2: Link prediction results of most frequent 10 relations in the test data for CONEX tested on FB15k-237. fre denotes the number of occurrences of a relation.

| Relations                                         | freq in Train-Test | MRR  | H@1  | H@3  | H@10 |
|---------------------------------------------------|--------------------|------|------|------|------|
| ../film_regional_release_date/film_release_region | 12,893-1447        | .508 | .338 | .618 | .844 |
| /people/person/profession                         | 10,945-1311        | .608 | .467 | .707 | .874 |
| ../award_nomination/award                         | 12,157-1067        | .307 | .168 | .344 | .627 |
| ../nominees/award_nomination/nominated_for        | 9,465-858          | .089 | .026 | .090 | .222 |
| ../film/film/performance/film                     | 9,494-836          | .027 | .009 | .025 | .057 |
| /film/film/genre                                  | 7,268-722          | .496 | .349 | .580 | .793 |
| /music/genre/artists                              | 5,880-664          | .114 | .069 | .104 | .199 |
| ../film/film_crew_gig/film_crew_role              | 5,305-606          | .719 | .582 | .822 | .967 |
| /people/person/nationality                        | 4,197-494          | .717 | .619 | .783 | .909 |
| /people/person/gender                             | 3,717-436          | .939 | .878 | 1.0  | 1.0  |

Table 3: Link prediction results on KINSHIP with different embedding sizes.

| Model    | Param. count | Emb. size | MRR         | H@10        | H@3         | H@1         |
|----------|--------------|-----------|-------------|-------------|-------------|-------------|
| DistMult | 2,660        | 20        | .602        | .920        | .695        | .453        |
| DistMult | 6,550        | 50        | .673        | .936        | .762        | .540        |
| DistMult | 13,300       | 100       | .687        | .949        | .775        | .555        |
| DistMult | 26,600       | 200       | .669        | .934        | .751        | .540        |
| ComplEx  | 5,320        | 20        | .742        | .972        | .837        | .615        |
| ComplEx  | 13,300       | 50        | .828        | .980        | .908        | .736        |
| ComplEx  | 26,600       | 100       | .850        | .977        | .922        | .770        |
| ComplEx  | 53,200       | 200       | .845        | .974        | .925        | .760        |
| ConvE    | 14,650       | 20        | .729        | .959        | .814        | .608        |
| ConvE    | 93,490       | 50        | .761        | .962        | .855        | .643        |
| ConvE    | 380,990      | 100       | .814        | .977        | .895        | .717        |
| ConvE    | 1,529,490    | 200       | .794        | .966        | .885        | .688        |
| TuckER   | 11,160       | 20        | .808        | .976        | .891        | .711        |
| TuckER   | 132,900      | 50        | .873        | .979        | .940        | .803        |
| TuckER   | 1,015,800    | 100       | .842        | .985        | .907        | .758        |
| TuckER   | 8,031,600    | 200       | .868        | .983        | .939        | .792        |
| CONEX    | 5,560        | 20        | .779        | .972        | .874        | .666        |
| CONEX    | 11,329       | 50        | .836        | .979        | .912        | .754        |
| CONEX    | 32,504       | 100       | .872        | <b>.988</b> | <b>.945</b> | .793        |
| CONEX    | 46,540       | 200       | <b>.886</b> | .985        | .944        | <b>.814</b> |

in 2D convolution, data augmentation technique by include reciprocal triples, respectively. Table 4 shows best performing hyper-parameter settings.

#### 4 IMPLEMENTATION, SOFTWARE VERSIONS AND HARDWARE

We implemented CONEX in Pytorch Paszke et al. (2017). Our experiments are conducted on the framework provided in Balažević et al. (2019). All experiments were carried out on Ubuntu 18.04 with 16 GB RAM with 4 Intel(R) Core(TM) i5-7300U CPU @ 2.60GHz processors.

Table 4: Best performing hyperparameter values

| Dataset          | $d$ | $dout_{input}$ | $dout_{hidden}$ | $dout_{feature\ map}$ | channel-out | r     |
|------------------|-----|----------------|-----------------|-----------------------|-------------|-------|
| CONEX-FB15K-237  | 20  | .1             | .1              | .1                    | 64          | False |
| CONEX-WN18RR     | 100 | .1             | .2              | .1                    | 64          | False |
| CONEX-KINSHIP    | 100 | .3             | .5              | .3                    | 2           | False |
| CONEX-UMLS       | 100 | .4             | .4              | .4                    | 8           | True  |
| ComplEx-KINSHIP  | 200 | .3             | -               | -                     | -           | False |
| ConvE-KINSHIP    | 100 | .1             | .1              | .1                    | 32          | False |
| DistMult-KINSHIP | 200 | .3             | -               | -                     | -           | False |
| TuckER-KINSHIP   | 100 | .3             | .4 and .5       | -                     | -           | True  |
| HypER-KINSHIP    | 50  | .2             | .3              | .2                    | 16          | False |
| ComplEx-UMLS     | 100 | .3             | -               | -                     | -           | False |
| DistMult-UMLS    | 100 | .3             | -               | -                     | -           | False |
| TuckER-UMLS      | 200 | .3             | .4 and .5       | -                     | -           | True  |
| HypER-UMLS       | 20  | .2             | .3              | .2                    | 16          | False |

## REFERENCES

- Ivana Balažević, Carl Allen, and Timothy M Hospedales. Tucker: Tensor factorization for knowledge graph completion. *arXiv preprint arXiv:1901.09590*, 2019.
- Antoine Bordes, Nicolas Usunier, Alberto Garcia-Duran, Jason Weston, and Oksana Yakhnenko. Translating embeddings for modeling multi-relational data. In *Advances in neural information processing systems*, pp. 2787–2795, 2013.
- Adam Paszke, Sam Gross, Soumith Chintala, Gregory Chanan, Edward Yang, Zachary DeVito, Zeming Lin, Alban Desmaison, Luca Antiga, and Adam Lerer. Automatic differentiation in pytorch. 2017.
